# 1      **Diversity, function and evolution of aquatic vertebrate genomes**

2      Yue Song<sup>1,2,#</sup>, Mengjun Yu<sup>1,#</sup>, Suyu Zhang<sup>1,#</sup>, Rui Zhang<sup>1,#</sup>, Inge Seim<sup>3</sup>, Xinyu Guo<sup>1</sup>,  
3      Meiru Liu<sup>1</sup>, Lili Yu<sup>1</sup>, He Zhang<sup>1,2</sup>, Hanbo Li<sup>1,2</sup>, Shanshan Liu<sup>1,2</sup>, Xin Liu<sup>1,2,4</sup>, Xun  
4      Xu<sup>1,2</sup>, Huanming Yang<sup>2</sup>, Kun Wang<sup>5</sup>, Shunping He<sup>6</sup>, Wen Wang<sup>5</sup>, Fish10K  
5      Consortium<sup>†</sup>, Guangyi Fan<sup>1,2,\*</sup>

6

7      <sup>1</sup>BGI-Qingdao, BGI-Shenzhen, Qingdao 266555, China.

8      <sup>2</sup>BGI-Shenzhen, Shenzhen 518083, China.

9      <sup>3</sup>Integrative Biology Laboratory, College of Life Sciences, Nanjing Normal University,  
10      Wenyuan Road 1, Nanjing 210046, China.

11      <sup>4</sup>China National GeneBank, BGI-Shenzhen, Shenzhen, 518120, China

12      <sup>5</sup>School of Ecology and Environment, Northwestern Polytechnical University, Xi'an  
13      710072, China.

14      <sup>6</sup>State Key Laboratory of Freshwater Ecology and Biotechnology, Institute of  
15      Hydrobiology, Chinese Academy of Sciences, Wuhan 430072, China.

16      <sup>#</sup>These authors contributed equally to this work.

17      \*Corresponding author: Guangyi Fan (fanguangyi@genomics.cn).

18

## 19      **Abstract**

20      Aquatic vertebrates consist of jawed fish (cartilaginous fish and bony fish), aquatic  
21      mammals, reptiles and amphibians. Here, we present a comprehensive analysis of 630  
22      aquatic vertebrate genomes to generate a standardized compendium of genomic data.  
23      We demonstrate its value by assessing their genome features as well as illuminating  
24      gene families related to the transition from water to land, such as *Hox* genes and  
25      olfactory receptor genes. We found that LINEs are the major transposable element  
26      (TE) type in cartilaginous fish and aquatic mammals, while DNA transposons are the  
27      dominate type in bony fish. To our surprise, TE types are not fixed in amphibians, the  
28      first group that transitioned to living on land. These results illustrate the value of a

29 unified resource for comparative genomic analyses of aquatic vertebrates. Our data  
30 and strategy are likely to support all evolutionary and ecological research on  
31 vertebrates.  
32

## 33 Introduction

34 Aquatic vertebrates , including fish, amphibians, reptiles, and marine mammals,  
 35 are ecologically, economically, and scientifically important for us, but remain  
 36 understudied compared to terrestrial taxa. High-quality, chromosome-level genomes  
 37 are essential for research of such species, since, finely assembled reference genomes  
 38 are the basis for large-scale functional multi-omics studies. As the improvement of  
 39 high-throughput sequencing technologies and analysis methods have greatly reduced  
 40 the cost of price and time to sequence the genome of any species, numerous aquatic  
 41 vertebrate genomes have been sequenced or under sequencing, supported by mega  
 42 scientific projects such as the 10,000 Genome project (Koepfli et al., 2015; Scientists,  
 43 2009), Vertebrate Genome Project (Consortium) and the Fish10K project (Guangyi et  
 44 al., 2020). Benefit from such data, we generated unified dataset and systemically  
 45 evaluated genomes from aquatic vertebrates to generate a standardized compendium  
 46 for comparative analyses. As results, we have provided evidences for phylogenetic  
 47 controversies, distinguished genome features of major aquatic vertebrate groups, and  
 48 preliminarily revealed molecular basis of the transition from aquatic to terrestrial  
 49 habitats.

## 50 Results

### 51 Data set collection and overview

52 We collected *de novo* assembled genomes of 630 species from five clades of  
 53 aquatic vertebrates: cartilaginous fish, bony fish, amphibians, reptiles, and marine  
 54 mammals (**Supplementary Table 1**). As indicated by **Figure 1**, the majority of  
 55 available genome assemblies are from fish. A unified nonredundant compendium of  
 56 aquatic vertebrate genomes was created and is publicly available at  
 57 <https://db.cngb.org/datamart/animal/DATAani19>. The resource was used to evaluate  
 58 various genome wide characteristics among diverse aquatic vertebrate taxa. We

assessed genome assembly quality and re-annotated TEs via a uniformed pipeline. As expected, the integrity and continuity of genome assemblies have been continuously improving for last 15 years (**Figure 2a**). We analyzed the data of jawed fishes (cartilaginous fish and bony fish) as the demonstration case, as they comprise half of extant vertebrate species and their last common ancestor with mammals can be dated back to 450 million years ago. Of 537 fish genome assemblies in our compendium, 269 (50.09%) have a scaffold N50 larger than 1 Mb and thus considered as high-quality. Among these high-quality genomes, 96 were assembled at the chromosome-level. 157 (29.23%) newly sequenced fish genomes have been obtained using stLFR linked-read sequencing technology and/or PacBio technology by the Fish10K consortium in the last two years (Bi et al., 2021; Guangyi et al., 2020; Wang et al., 2019). We reannotated the 269-species's high-quality genome assembly using ab initio gene prediction and homology-based prediction methods, and identified around 20,000 genes for each species (See the methods section). For TEs reannotation, a uniformed pipeline was performed by a combined method of *de novo* and homology-based analysis (See the methods section), averagely 32.75% of TE content is located for these species. For comparison also reannotated the genomes of 15 amphibians, 26 reptiles, and 52 marine mammals (**Supplementary Table 2**).

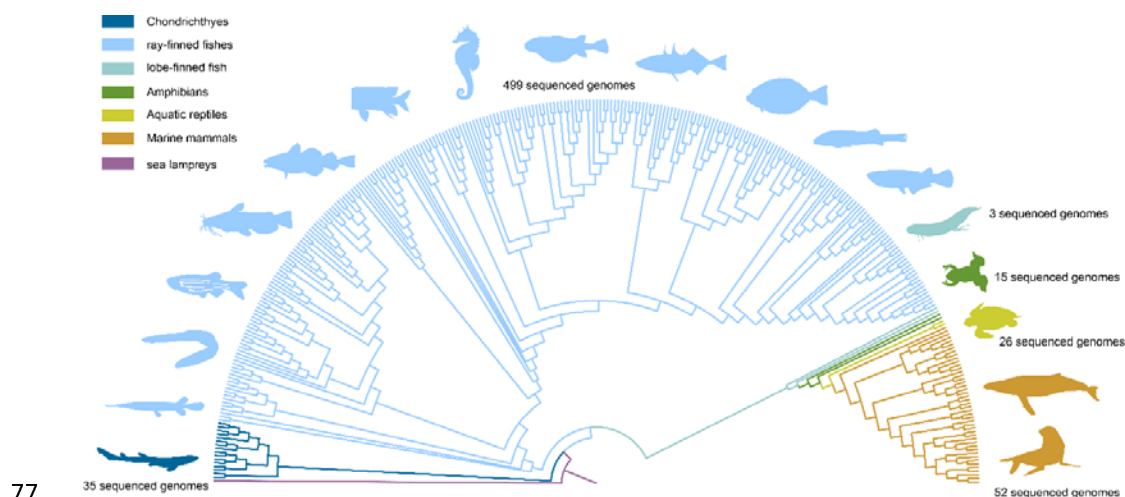

## 78 **Figure 1. Overview of the major clades in the 630 aquatic vertebrate genome resources.**

79 Assembled nuclear genomes are shown. Note that the phylogeny is for illustrative purposes  
80 only.

## 81 **Genome size and transposable elements diversity**

82 C-value is the amount of DNA contained within a haploid nucleus (e.g., a gamete)  
83 or one half the amount in a diploid somatic cell of a eukaryotic organism, usually  
84 scaled in picograms. This method of measuring the genome size experimentally is  
85 often used to make genome-size comparisons in different species. In agreement with  
86 C-value data from the Genome Size database (Gregory, 2005) and a recent genomics  
87 study (Gregory et al., 2007; Vinogradov, 2004) (**Figure 2b**), the size of assembled  
88 genomes varied tremendously among aquatic vertebrates. Amphibians (i.e., frogs,  
89 salamanders, and cecilians) is a clade with significant variation in genome size  
90 (Liedtke et al., 2018), assembled genomes are ranged (average 4.41 Gb) from 0.5 Gb  
91 (Couch's spadefoot toad *Scaphiopus couchii*) (Gregory, 2002b) to 32 Gb (axolotl  
92 *Ambystoma mexicanum*) (Nowoshilow et al., 2018). Although not as significant as in  
93 amphibians, genome size variations were also observed in fish (**Figure 2b**). The range  
94 in bony fish (Osteichthyes) is from 350 Mb (Tetraodontiformes) to 40 Gb (lungfishes)  
95 (Meyer et al., 2021; Wang et al., 2021), while in cartilaginous fish (Chondrichthyes) is  
96 from 3 Gb (*Chiloscyllium plagiosum*) (Zhang et al., 2020) to 6.7 Gb (cloudy catshark:  
97 *Scyliorhinus torazame*) (Hara et al., 2018).

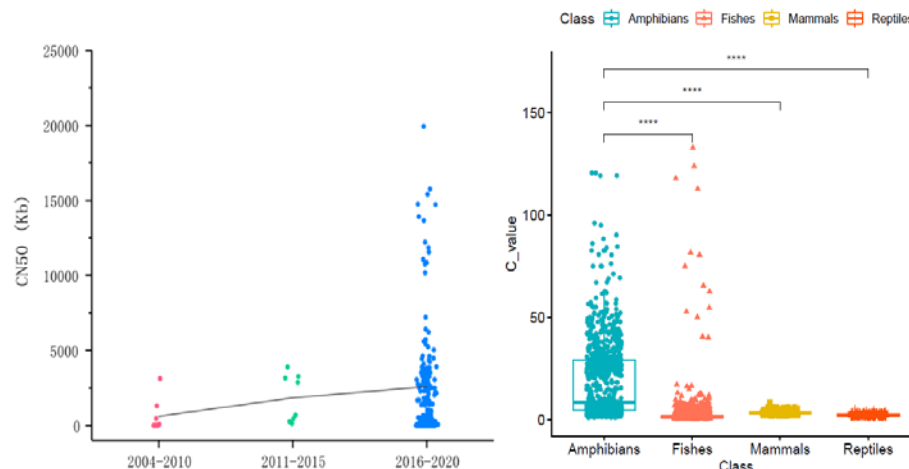

**Figure 2. Assembly quality of the aquatic vertebrate genomes.** a) Boxplot of contig N50 of 473 published genomes in fish, amphibians, aquatic reptiles and marine mammals during the period 2004-2020. Since 2015, due to the cost reduction of sequencing and the development of new sequencing technologies (e.g. Hi-C, PacBio, stLFR) (Belton et al., 2012; Rhoads and Au, 2015; Wang et al., 2019), both the integrity of genome assembly and the number of sequenced species have increased significantly in recent years. b) Boxplot of genome C-value in aquatic vertebrate groups. C-value (genome size) data was obtained from the Animal Genome Size database (Dufresne and Jeffery, 2011; Gregory, 2002a, 2005).

Variations of genome size is usually related to transposable element (TE) diversity (Shao et al., 2019; Sotero-Caio et al., 2017). The average TE content of 15 amphibians, 26 reptiles, and 52 marine mammals is 40.41%, 38.20% and 34.39%, respectively (**Supplementary Table 2**). The average TE content proportion of most fishes is ~32%. However, there are exceptions, in *Monacanthus chinensis* and *Thalassophryne amazonica*, 9.26% and 83.84% of the genome are derived from TEs, respectively (**Supplementary Table 2**). We observed an obvious inflection point between TE and genome size in bony fish (**Figure 3b**), which consistent with the relationship between TE activity and repression strategies in lungfish (Wang et al., 2021). We also observed an obvious direct, relationship between TE content and genome size in aquatic vertebrates, especially in bony fish ( $R^2=0.7$ ,  $p<2.2e-16$ ) (**Figure 3b**). This relationship has been postulated to stem from major genomic rearrangements as well as missing regions stemming from limitations of DNA

sequencing technologies, despite the latter can now often be resolved by long (e.g., PacBio and ONT) (Goodwin et al., 2015; Rhoads and Au, 2015) and co-barcoding sequencing technologies (e.g, stLFR and 10X genomics) (Wang et al., 2019).

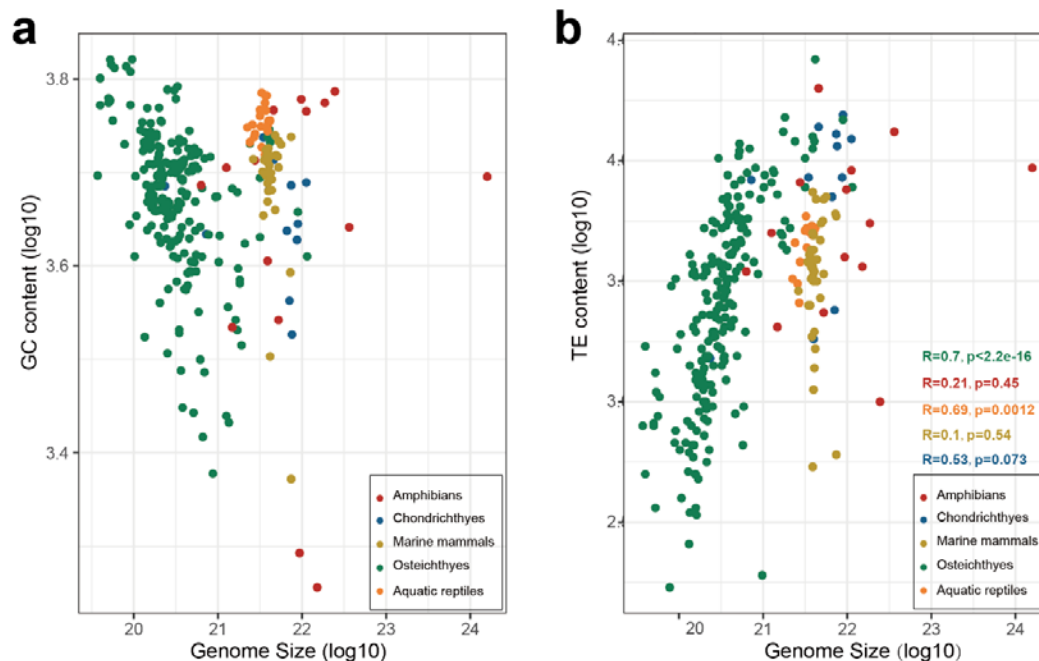

**Figure 3. The proportional distribution of TEs in aquatic vertebrate genomes.** The horizontal and vertical axis correspond to the logarithmic value of true genome size and GC content (a), TE content (b). **a)** There was no significant positive correlation between GC content and genome size; **b)** There is a positive correlation between TE and genome size, but the positive correlation is not strict in other species except Osteichthyes. This inconsistency may be related to less available genome data in different animal species.

By comparing the proportion of TEs of each genome, the proportion of TE types in species during the water-to-land evolutionary status was notably different. LINEs are the dominate component for cartilaginous fishes, and the scenario is similar for marine mammals. Meanwhile, DNA transposon is the major TE type in bony fish. The positions of the DNA transposon and LINE of Amphibians, as the evolutionary bridge from aquatic to terrestrial species, are not fixed in different species. DNA transposon is dominate in most of Anura species, but not in the three Gymnophiona species (*Geotrypetes seraphini*, *Rhinatrema bivittatum* and *Microcaecilia unicolor*) (Figure

138 4). For TE proportion, we proposed that one kind of special TE transformation pattern  
139 were involved in the evolutionary process from aquatic to terrestrial environment.

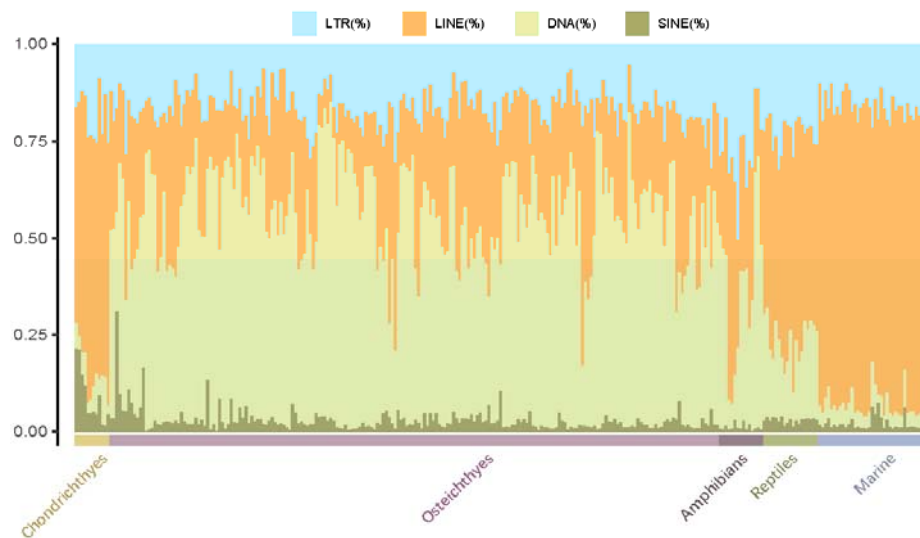

140

141 **Figure 4. The statistics of main transposable element in marine vertebrate.** LINEs in  
142 cartilaginous fishes are the dominate component (horizontal yellow bar at the bottom) and the  
143 similar scenario in marine mammals. While, DNA transposon is the top type in bony fish  
144 (horizontal purple bar at the bottom). Amphibians, as the evolutionary bridge from aquatic to  
145 terrestrial species, shown different modes of TE component in different species.

146 Furthermore, to detect whether there was divergence of LINE/CR1 and LINE/L2  
147 between the Cartilaginous fish and bony fish, we constructed NJ trees with CR1 and  
148 L2 sequences from 11 bony fishes and 11 cartilaginous fishes, respectively. Although  
149 most of the CR1 sequences comes from cartilaginous fish genome and only a few of  
150 belong to bony fish, all the LINE/CR1 were clustered into two significant groups,  
151 corresponding to cartilaginous and bony fish, which is similar in LINE/L2 subtype  
152 **(Figure 5).**

153

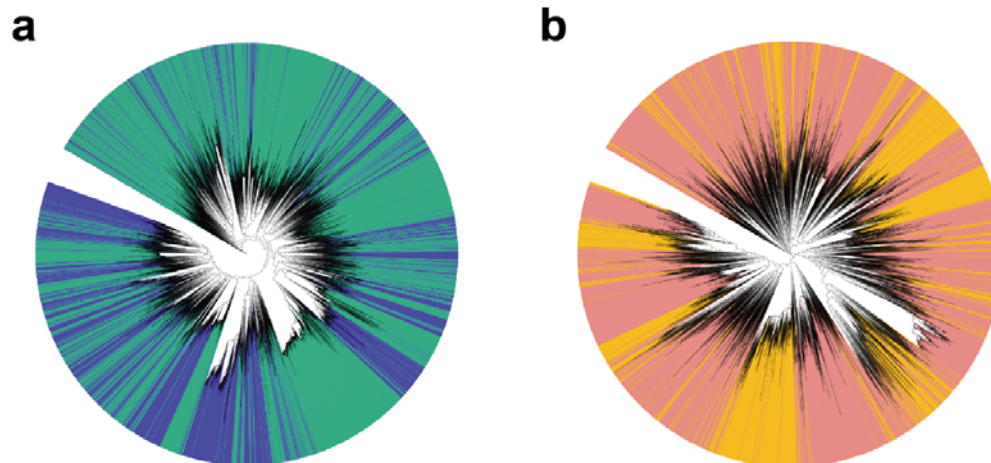

**Figure 5. The phylogenetics trees of LINE/CR1 (a) and LINE/L2 (b).** **a)** The blue branch indicated Chondrichthyes-source CR1 sequences and green branch indicated the Osteichthyes-source sequences. **b)** The orange branch indicated Chondrichthyes-source L2 sequences and pink branch indicated the Osteichthyes-source sequences. It could be observed that in (a) and (b), cartilaginous fish and bony fish have clarity difference in CR1 and L2.

### Key gene families involved in water-land transitions

In the process of evolution, great change has been taken place in marine vertebrates regardless environment or body size. To better understand such change, we highlighted *Hox* and Olfactory receptor (OR) gene families (See the methods section). *Hox* genes are belong to an important family for developmental regulation in organisms. It encodes a class of transcription factors, binding to a specific region of DNA which regulates the morphogenesis of the body axis during ontogenesis in animals, plays an important regulatory role in the development of individual embryos (Di-Poi et al., 2009; Di-Poi et al., 2010; Duboule, 1998; Lemons and McGinnis, 2006). Therefore, the study of the *Hox* gene family not only helps us understand the genetic control in animal ontogenesis, but also helps us explain the fin-to-limb transition in the evolution of vertebrates from aquatic to terrestrial at molecular level. By using published data, we identified *Hox* gene family in 63 published genomes according to the road map of evolution, the genomes are from 7 cartilaginous fishes, 47 boney

175 fishes, 4 amphibians, 4 reptiles and 4 marine mammals. Interestingly, bony fishes are  
 176 not showing the similar downward trend as observed in other species, as several  
 177 WGD events happened. For example, *Salmo salar* contains 109 *Hox* genes due to its  
 178 genome-wide replication events (the *Salmo*-specific WGD) (Lien et al., 2016) (**Figure**  
 179 **6**).

180 *Hox* genes are not only various in number, but also significantly different for  
 181 functional gene missing. Among different cluster of *Hox* genes in these species, most  
 182 of *HoxA* and *HoxB* genes are relatively conserved in different species, except for the  
 183 sea lamprey. *HoxC* is low in gene number as some of such genes were missing in  
 184 cartilaginous fishes and sea lampreys. Such pattern was changed dramatically in bony  
 185 fish (e.g., *Acipenser ruthenus*), in which *HoxC* is remarkably increased in gene  
 186 number. (**Figure 6**). This obvious change of *HoxC* gene is potentially caused by two  
 187 rounds of genome-wide replication in early vertebrates (Damas et al., 2018;  
 188 Venkatesh et al., 2014), as one of the duplicated homologous regions occurred a large  
 189 number of gene deletions, maintained the status consistent with early vertebrate  
 190 differentiation.

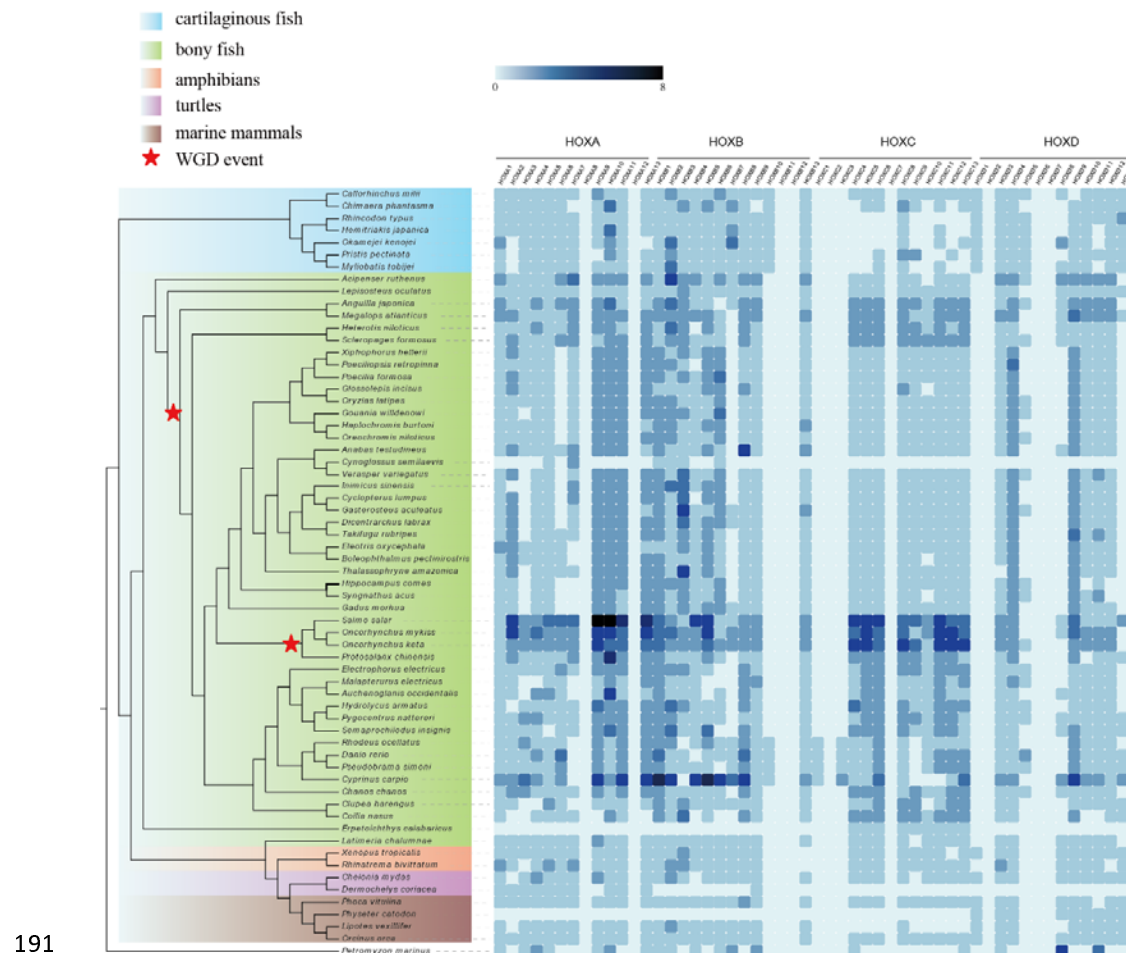

**Figure 6. Heatmap of *Hox* gene number in different clades.**

In previous research, vertebrate OR genes can be classified into two types, which are further classified to 11 groups (**Figure 7,  $\alpha$ - $\lambda$** ) corresponding to the 11 ancestral OR genes of the most common recent ancestor among vertebrate species (Freitag et al., 1998; Gaillard et al., 2004; Liu et al., 2019a; Niimura and Nei, 2005). We identified the OR genes in 62 representative aquatic and terrestrial species, where Amphibia species (such as xenopus and axolotl) possessed approximately 1000 OR genes in the genome, which is much more than other species. In Actinopterygii, the family size of OR genes are basically less than 200, normally less than 100. To our surprise, there are only less than five OR genes in each Chondrichthyes genomes in our results and few of them related to water-soluble odors detection (class  $\delta$ ,  $\epsilon$ ,  $\zeta$  and  $\eta$ ) in cartilaginous fish. This is very different with the case of bony fish. In bony fish, the

largest number of OR genes are responsible for detect odors in water. In some fish of the basal Actinopterygii, there are OR genes related to air detection (class  $\gamma$ ). Such results suggest that the ability to use air has been developed in the early differentiation of bony fish (Figure 7), which consistent with previous research (Bi et al., 2021).

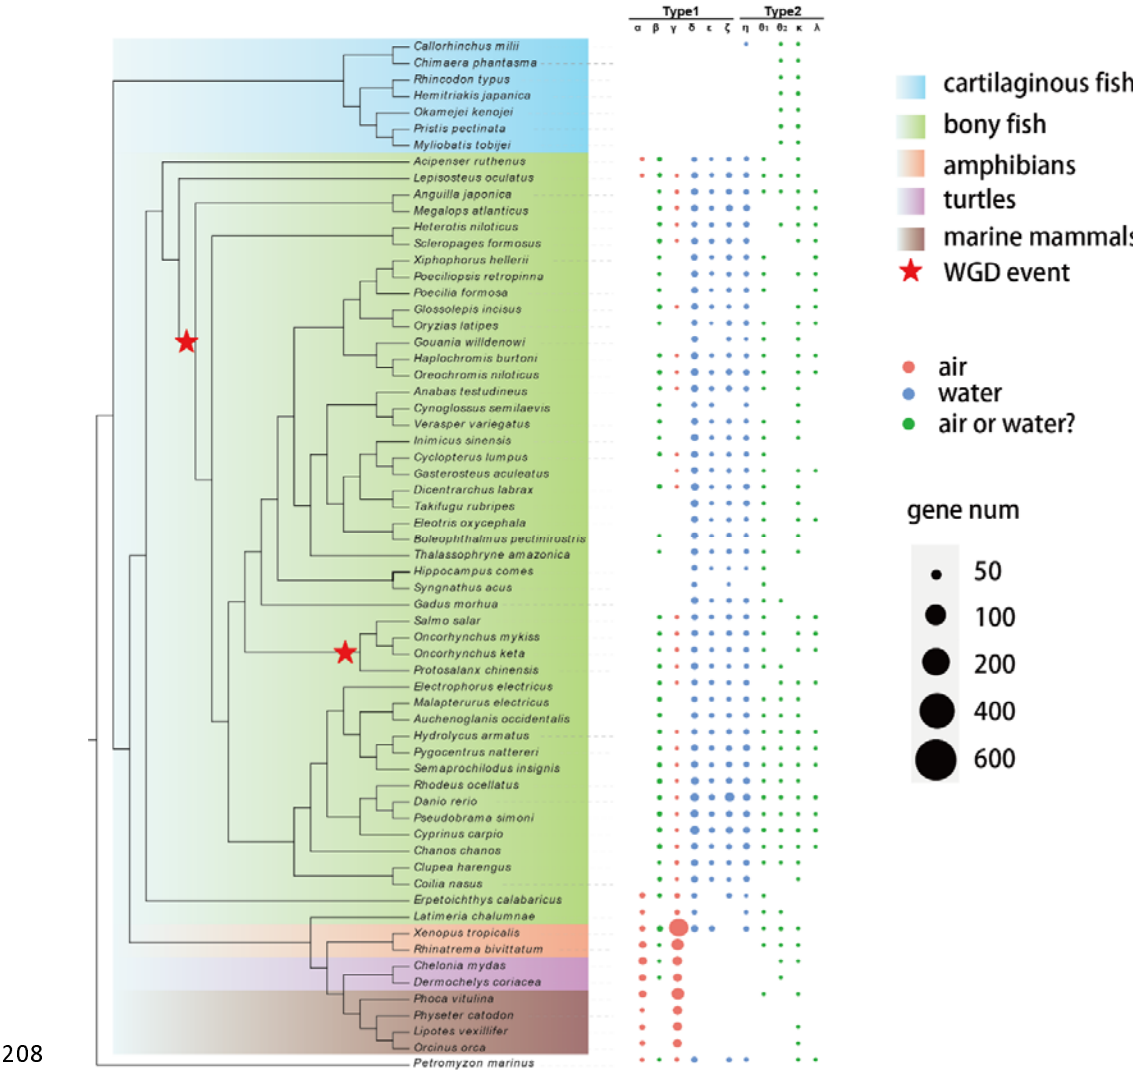

**Figure 7. Gene number of olfactory receptors in 62 representing species, covered fish, amphibia, reptilian and marine mammals.** The identified OR genes were divided into 11 groups ( $\alpha$ - $\lambda$ ). “water-soluble” indicated these classes could be used to detect odors that soluble in water and “air” indicated could be used to detect odors which float through the air.

214 All OR genes in these typical species were used to construct phylogenetic tree. Two  
 215 non-OR GPCRs were used as outgroup (NP\_005292.2 and NP\_037477.1) (**Figure 8**).  
 216 We noticed that each branch harbors OR genes from different groups. For instance,  
 217 branch (a) clustered only tetrapod OR genes (Amphibia, Aquatic reptilian and Marine  
 218 mammals), so this branch may be corresponded to group  $\alpha$  and  $\gamma$ . These two groups  
 219 were known to present in tetrapod's but absent in fish. To adapt both aquatic and  
 220 terrestrial environments, the OR genes of Amphibia were obviously expanded across  
 221 the phylogenetic tree, formed a large family to detect both water-soluble molecules  
 222 and air molecules. The Sarcopterygii-specific OR genes are exhibited similar pattern  
 223 of amphibians, clustered together with tetrapods OR genes (branch b), which might be  
 224 involved into the early evolution from aquatic to terrestrial.

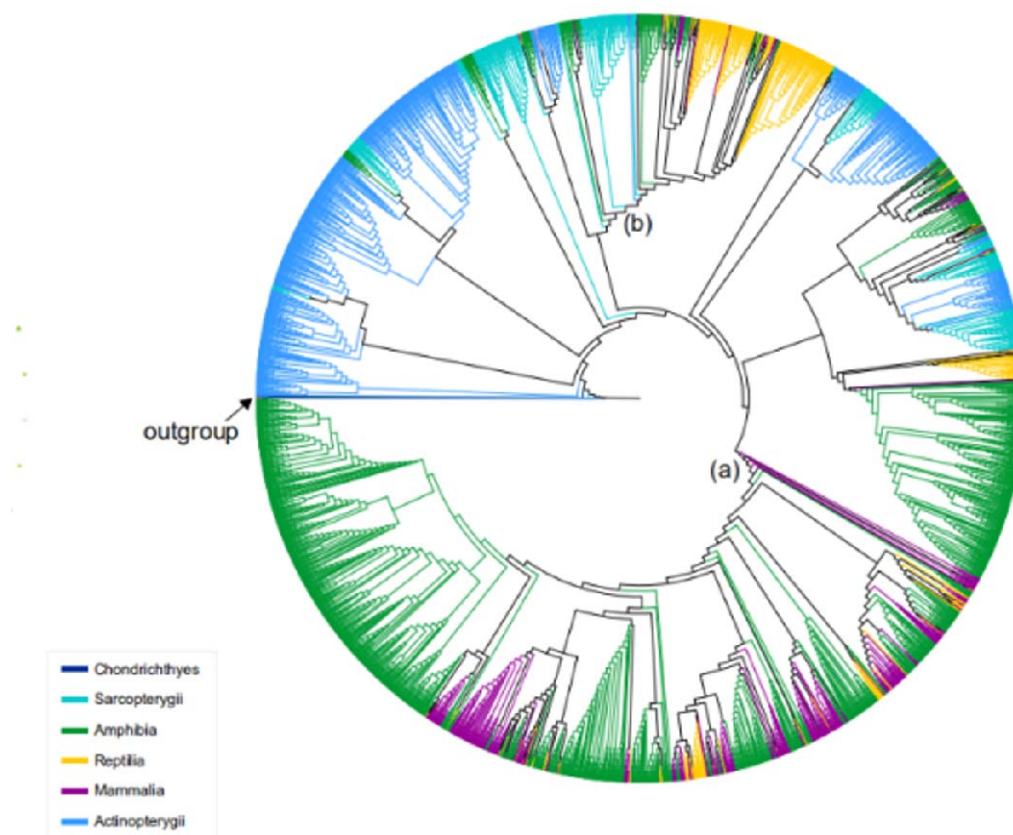

226 **Figure 8. The phylogenetic tree of olfactory receptors of aquatic vertebrate genomes.**

227

228

## 229    **Methods**

### 230    **Genomic sequencing and assembly**

231    To assemble the newly sequenced genome, about 150Gb (~100X) sequence data was  
 232    generated using BGI-SEQ 500 platform for each species. Then the format of  
 233    sequencing data was transformed from stLFR to similar format of 10X Genomics.  
 234    After the transformation, Supernova (version 2.1) (Weisenfeld et al., 2017) was used  
 235    for genome assembly with default parameters. Finally, Gapcloser software (Luo et al.,  
 236    2012) was used to fill the gaps within the assembly with default parameters.

### 237    **Re-annotation of transposable elements**

238    In order to ensure the comparability of transposable elements annotation between  
 239    different species, we adopted a unified method and software for transposon re-  
 240    annotation. Two major types of repetitive sequences (tandem repeats and transposable  
 241    elements) in this research have been reannotated. According to the method of  
 242    previously research (Li et al., 2018; Liu et al., 2019b; Song et al., 2016), TRFs were  
 243    identified using Tandem Repeats Finder (version 4.04) (Benson, 1999) and  
 244    transposable elements (TEs) were identified by a combination of homology-based and  
 245    *de novo* approaches. For homology-based approaches, different type of transposable  
 246    elements sequences in Repbase (version 16.02) (Bao et al., 2015) were aligned against  
 247    the assembly using RepeatMasker (version 3.2.9) (Smit et al., 2015). For *de novo*  
 248    annotation, a *de novo* non-redundant repeat library was constructed using  
 249    RepeatModeler (version 1.1.0.4) (Smit and Hubley, 2008) and then the newly and  
 250    species-specific transposable elements were identified using RepeatMasker (Smit et  
 251    al., 2015).

### 252    **Protein-coding genes annotation**

253    Protein-coding gene were then predicted by a combination of two ways: (1) the ab  
 254    initio gene prediction and (2) the homology-based annotation (Ao et al., 2015; Shao et  
 255    al., 2018; Valenzano et al., 2015). For ab initio gene prediction approaches, Augustus

(Stanke et al., 2006) was used with *Danio rerio* as the reference model to predicted gene models; For homology-based annotation, protein sequences of 6 related species, including zebra fish (Howe et al., 2013), spot gar (Braasch et al., 2016), elephant shark (Venkatesh et al., 2014), frog (Hellsten et al., 2010), turtle (Wang et al., 2013), dolphin (McGowen et al., 2012) and single-copy orthologs of vertebrate from BUSCO (Manni et al., 2021), were aligned against the genome assembly using BLAT software (version 0.36) (Kent, 2002) and GeneWise software (version 2.4.1) (Birney et al., 2004). The final Protein-coding gene set for each species was obtained by combining the predicted and annotated genes using Glean software (version 1.0) (Elsik et al., 2007).

## Prediction of *Hox* and olfactory receptor (OR) genes

*Hox* and olfactory receptor genes were identified using tblastn software (McGinnis and Madden, 2004) for the alignment search in each genome with homologous protein sequence of *Hox* and olfactory receptor genes from zebra fish, sport gar, frog and human as queries. We then predicted the structure of sequenced genes by using blast hit sequence with the software GeneWise (Birney et al., 2004), extending 2,000bp in both 3' and 5' directions along the genome sequences.

## References

- Ao, J., Mu, Y., Xiang, L.-X., Fan, D., Feng, M., Zhang, S., Shi, Q., Zhu, L.-Y., Li, T., and Ding, Y. (2015). Genome sequencing of the perciform fish *Larimichthys crocea* provides insights into molecular and genetic mechanisms of stress adaptation. *PLoS genetics* *11*, e1005118.
- Bao, W., Kojima, K.K., and Kohany, O. (2015). Repbase Update, a database of repetitive elements in eukaryotic genomes. *Mob DNA* *6*, 11.
- Belton, J.-M., McCord, R.P., Gibcus, J.H., Naumova, N., Zhan, Y., and Dekker, J. (2012). Hi-C: a comprehensive technique to capture the conformation of genomes. *Methods* *58*, 268-276.
- Benson, G. (1999). Tandem repeats finder: a program to analyze DNA sequences. *Nucleic acids research* *27*, 573-580.
- Bi, X., Wang, K., Yang, L., Pan, H., Jiang, H., Wei, Q., Fang, M., Yu, H., Zhu, C., Cai, Y., et al. (2021). Tracing the genetic footprints of vertebrate landing in non-teleost ray-finned fishes. *Cell* *184*, 1377-1391 e1314.
- Birney, E., Clamp, M., and Durbin, R. (2004). GeneWise and genomewise. *Genome research* *14*, 988-995.

288 Braasch, I., Gehrke, A.R., Smith, J.J., Kawasaki, K., Manousaki, T., Pasquier, J., Amores, A.,  
289 Desvignes, T., Batzel, P., and Catchen, J.M. (2016). The spotted gar genome illuminates vertebrate  
290 evolution and facilitates human-teleost comparisons. *Nature Genetics* 48, 427-437.

291 Consortium, G.K. Vertebrate Genomes Project (VGP).

292 Damas, J., Kim, J., Farre, M., Griffin, D.K., and Larkin, D.M. (2018). Reconstruction of avian  
293 ancestral karyotypes reveals differences in the evolutionary history of macro- and  
294 microchromosomes. *Genome Biol* 19, 155.

295 Di-Poi, N., Montoya-Burgos, J.I., and Duboule, D. (2009). Atypical relaxation of structural  
296 constraints in Hox gene clusters of the green anole lizard. *Genome Res* 19, 602-610.

297 Di-Poi, N., Montoya-Burgos, J.I., Miller, H., Pourquie, O., Milinkovitch, M.C., and Duboule, D.  
298 (2010). Changes in Hox genes' structure and function during the evolution of the squamate body  
299 plan. *Nature* 464, 99-103.

300 Duboule, D. (1998). Vertebrate hox gene regulation: clustering and/or colinearity? *Current opinion*  
301 *in genetics & development* 8, 514-518.

302 Dufresne, F., and Jeffery, N. (2011). A guided tour of large genome size in animals: what we know  
303 and where we are heading. *Chromosome Res* 19, 925-938.

304 Elsie, C.G., Mackey, A.J., Reese, J.T., Milshina, N.V., Roos, D.S., and Weinstock, G.M. (2007).  
305 Creating a honey bee consensus gene set. *Genome biology* 8, R13.

306 Freitag, J., Ludwig, G., Andreini, I., Rössler, P., and Breer, H. (1998). Olfactory receptors in  
307 aquatic and terrestrial vertebrates. *Journal of Comparative Physiology A* 183, 635-650.

308 Gaillard, I., Rouquier, S., and Giorgi, D. (2004). Olfactory receptors. *Cellular and Molecular Life*  
309 *Sciences CMLS* 61, 456-469.

310 Goodwin, S., Gurtowski, J., Ethe-Sayers, S., Deshpande, P., Schatz, M.C., and McCombie, W.R.  
311 (2015). Oxford Nanopore sequencing, hybrid error correction, and de novo assembly of a  
312 eukaryotic genome. *Genome research* 25, 1750-1756.

313 Gregory, T.R. (2002a). Animal genome size database. <http://www.genomesize.com>.

314 Gregory, T.R. (2002b). Genome size and developmental complexity. *Genetica* 115, 131-146.

315 Gregory, T.R. (2005). Genome size evolution in animals. In *The evolution of the genome*  
316 (Elsevier), pp. 3-87.

317 Gregory, T.R., Nicol, J.A., Tamm, H., Kullman, B., Kullman, K., Leitch, I.J., Murray, B.G.,  
318 Kapraun, D.F., Greilhuber, J., and Bennett, M.D. (2007). Eukaryotic genome size databases.  
319 *Nucleic Acids Res* 35, D332-338.

320 Guangyi, F., Yue, S., Liandong, Y., Xixoyun, H., Suyu, Z., Mengqi, Z., Xianwei, Y., Yue, C.,  
321 Yongxin, L., Shanshan, L., *et al.* (2020). Fish10K Pilot Project Data GigaScience Database.  
322 GigaScience Database.

323 Hara, Y., Yamaguchi, K., Onimaru, K., Kadota, M., Koyanagi, M., Keeley, S.D., Tatsumi, K.,  
324 Tanaka, K., Motone, F., and Kageyama, Y. (2018). Shark genomes provide insights into  
325 elasmobranch evolution and the origin of vertebrates. *Nature ecology & evolution* 2, 1761-1771.

326 Hellsten, U., Harland, R.M., Gilchrist, M.J., Hendrix, D., Jurka, J., Kapitonov, V., Ovcharenko, I.,  
327 Putnam, N.H., Shu, S., and Taher, L. (2010). The genome of the Western clawed frog *Xenopus*  
328 *tropicalis*. *Science* 328, 633-636.

329 Howe, K., Clark, M.D., Torroja, C.F., Torrance, J., Berthelot, C., Muffato, M., Collins, J.E.,  
330 Humphray, S., McLaren, K., and Matthews, L. (2013). The zebrafish reference genome sequence  
331 and its relationship to the human genome. *Nature* 496, 498.

332 Kent, W.J. (2002). BLAT—the BLAST-like alignment tool. *Genome research* 12, 656-664.

333 Koepfli, K.P., Paten, B., Genome, K.C.o.S., and O'Brien, S.J. (2015). The Genome 10K Project: a  
334 way forward. *Annu Rev Anim Biosci* 3, 57-111.

335 Lemons, D., and McGinnis, W. (2006). Genomic evolution of Hox gene clusters. *Science* 313,  
336 1918-1922.

337 Li, C., Liu, X., Liu, B., Ma, B., Liu, F., Liu, G., Shi, Q., and Wang, C. (2018). Draft genome of the  
338 Peruvian scallop *Argopecten purpuratus*. *GigaScience* 7, giy031.

339 Liedtke, H.C., Gower, D.J., Wilkinson, M., and Gomez-Mestre, I. (2018). Macroevolutionary shift  
340 in the size of amphibian genomes and the role of life history and climate. *Nat Ecol Evol* 2, 1792-  
341 1799.

342 Lien, S., Koop, B.F., Sandve, S.R., Miller, J.R., Kent, M.P., Nome, T., Hvidsten, T.R., Leong, J.S.,  
343 Minkley, D.R., and Zimin, A. (2016). The Atlantic salmon genome provides insights into  
344 rediploidization. *Nature* 533, 200-205.

345 Liu, A., He, F., Shen, L., Liu, R., Wang, Z., and Zhou, J. (2019a). Convergent degeneration of  
346 olfactory receptor gene repertoires in marine mammals. *BMC Genomics* 20, 977.

347 Liu, H.-P., Xiao, S.-J., Wu, N., Wang, D., Liu, Y.-C., Zhou, C.-W., Liu, Q.-Y., Yang, R.-B., Jiang,  
348 W.-K., and Liang, Q.-Q. (2019b). The sequence and de novo assembly of *Oxygymnocypis*  
349 *stewartii* genome. *Scientific data* 6, 190009.

350 Luo, R., Liu, B., Xie, Y., Li, Z., Huang, W., Yuan, J., He, G., Chen, Y., Pan, Q., and Liu, Y. (2012).  
351 SOAPdenovo2: an empirically improved memory-efficient short-read de novo assembler.  
352 *GigaScience* 1, 18.

353 Manni, M., Berkeley, M.R., Seppey, M., Simao, F.A., and Zdobnov, E.M. (2021). BUSCO update:  
354 novel and streamlined workflows along with broader and deeper phylogenetic coverage for  
355 scoring of eukaryotic, prokaryotic, and viral genomes. *arXiv preprint arXiv:210611799*.

356 McGinnis, S., and Madden, T.L. (2004). BLAST: at the core of a powerful and diverse set of  
357 sequence analysis tools. *Nucleic acids research* 32, W20-W25.

358 McGowen, M.R., Grossman, L.I., and Wildman, D.E. (2012). Dolphin genome provides evidence  
359 for adaptive evolution of nervous system genes and a molecular rate slowdown. *Proceedings of*  
360 *the Royal Society B: Biological Sciences* 279, 3643-3651.

361 Meyer, A., Schloissnig, S., Franchini, P., Du, K., Woltering, J.M., Irisarri, I., Wong, W.Y.,  
362 Nowoshilow, S., Kneitz, S., Kawaguchi, A., *et al.* (2021). Giant lungfish genome elucidates the  
363 conquest of land by vertebrates. *Nature* 590, 284-289.

364 Niimura, Y., and Nei, M. (2005). Evolutionary dynamics of olfactory receptor genes in fishes and  
365 tetrapods. *Proceedings of the National Academy of Sciences* 102, 6039-6044.

366 Rhoads, A., and Au, K.F. (2015). PacBio sequencing and its applications. *Genomics, proteomics &*  
367 *bioinformatics* 13, 278-289.

368 Scientists, G.K.C.o. (2009). Genome 10K: a proposal to obtain whole-genome sequence for 10  
369 000 vertebrate species. *Journal of Heredity* 100, 659-674.

370 Shao, C., Li, C., Wang, N., Qin, Y., Xu, W., Liu, Q., Zhou, Q., Zhao, Y., Li, X., Liu, S., *et al.*  
371 (2018). Chromosome-level genome assembly of the spotted sea bass, *Lateolabrax maculatus*.  
372 *GigaScience* 7.

373 Shao, F., Han, M., and Peng, Z. (2019). Evolution and diversity of transposable elements in fish  
374 genomes. *Sci Rep* 9, 15399.

375 Smit, A., and Hubley, R. (2008). RepeatModeler Open-1.0. Available fom <http://www>

repeatmasker.org.

Smit, A., Hubley, R., and Green, P. (2015). RepeatMasker Open-4.0. 2013–2015.

Song, L., Bian, C., Luo, Y., Wang, L., You, X., Li, J., Qiu, Y., Ma, X., Zhu, Z., and Ma, L. (2016). Draft genome of the Chinese mitten crab, *Eriocheir sinensis*. *GigaScience* 5, 5.

Sotero-Caio, C.G., Platt, R.N., 2nd, Suh, A., and Ray, D.A. (2017). Evolution and Diversity of Transposable Elements in Vertebrate Genomes. *Genome Biol Evol* 9, 161-177.

Stanke, M., Keller, O., Gunduz, I., Hayes, A., Waack, S., and Morgenstern, B. (2006). AUGUSTUS: ab initio prediction of alternative transcripts. *Nucleic acids research* 34, W435-W439.

Valenzano, D.R., Benayoun, B.A., Singh, P.P., Zhang, E., Etter, P.D., Hu, C.-K., Clément-Ziza, M., Willemsen, D., Cui, R., and Harel, I. (2015). The African turquoise killifish genome provides insights into evolution and genetic architecture of lifespan. *Cell* 163, 1539-1554.

Venkatesh, B., Lee, A.P., Ravi, V., Maurya, A.K., Lian, M.M., Swann, J.B., Ohta, Y., Flajnik, M.F., Sutoh, Y., and Kasahara, M.J.N. (2014). Elephant shark genome provides unique insights into gnathostome evolution. *505*, 174.

Vinogradov, A.E. (2004). Genome size and extinction risk in vertebrates. *Proceedings of the Royal Society of London Series B: Biological Sciences* 271, 1701-1705.

Wang, K., Wang, J., Zhu, C., Yang, L., Ren, Y., Ruan, J., Fan, G., Hu, J., Xu, W., Bi, X., *et al.* (2021). African lungfish genome sheds light on the vertebrate water-to-land transition. *Cell* 184, 1362-1376 e1318.

Wang, O., Chin, R., Cheng, X., Wu, M.K.Y., Mao, Q., Tang, J., Sun, Y., Anderson, E., Lam, H.K., Chen, D., *et al.* (2019). Efficient and unique cobarcoding of second-generation sequencing reads from long DNA molecules enabling cost-effective and accurate sequencing, haplotyping, and de novo assembly. *Genome Res* 29, 798-808.

Wang, Z., Pascual-Anaya, J., Zadissa, A., Li, W., Niimura, Y., Huang, Z., Li, C., White, S., Xiong, Z., Fang, D., *et al.* (2013). The draft genomes of soft-shell turtle and green sea turtle yield insights into the development and evolution of the turtle-specific body plan. *Nat Genet* 45, 701-706.

Weisenfeld, N.I., Kumar, V., Shah, P., Church, D.M., and Jaffe, D.B. (2017). Direct determination of diploid genome sequences. *Genome research* 27, 757-767.

Zhang, Y., Gao, H., Li, H., Guo, J., Ouyang, B., Wang, M., Xu, Q., Wang, J., Lv, M., and Guo, X. (2020). The white-spotted bamboo shark genome reveals chromosome rearrangements and fast-evolving immune genes of cartilaginous fish. *Iscience* 23, 101754.
